# Supplementary figures and images for: An oxygen-scavenging system without impact on DNA mechanical properties in single-molecule fluorescence experiments
Source: Royal Society of Chemistry journal article supplement (doi:10.1039/d4nr04287e), 2024-12-03

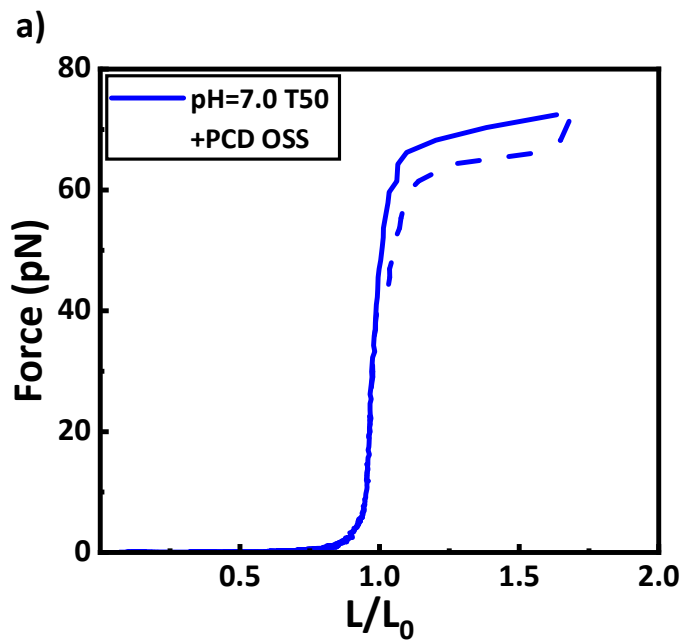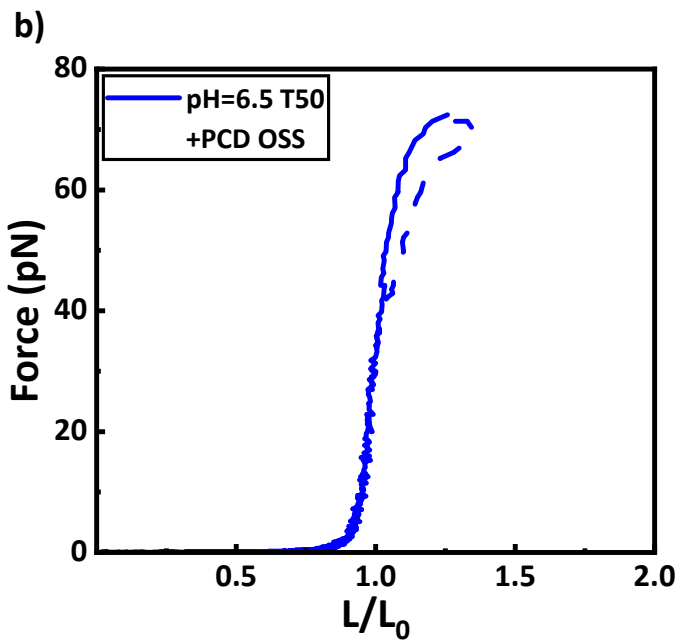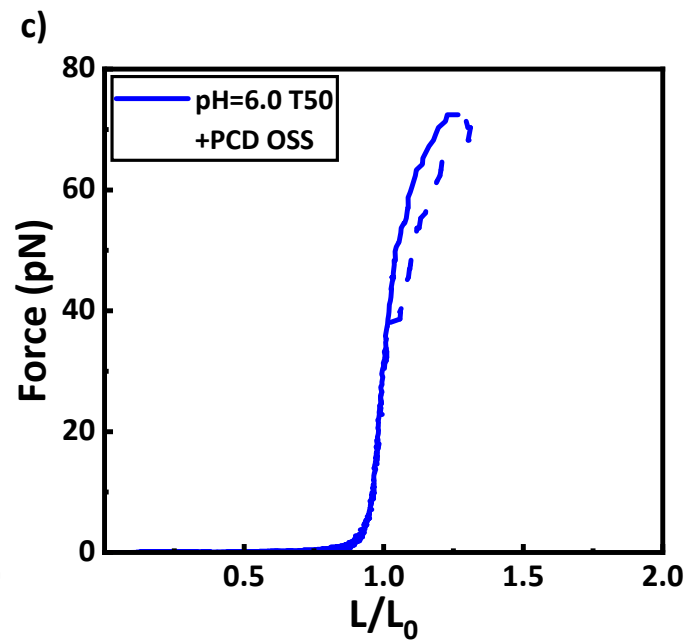

Supplement: d4nr04287e10.pdf [file d4nr04287e10.pdf]

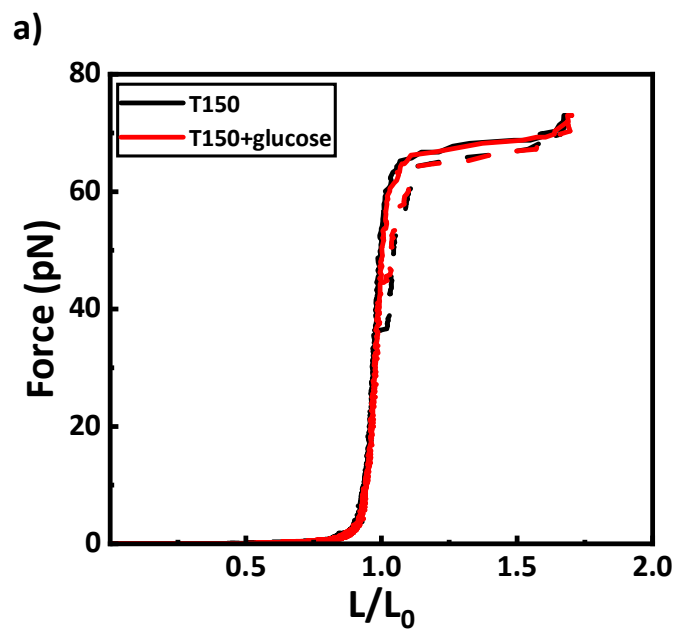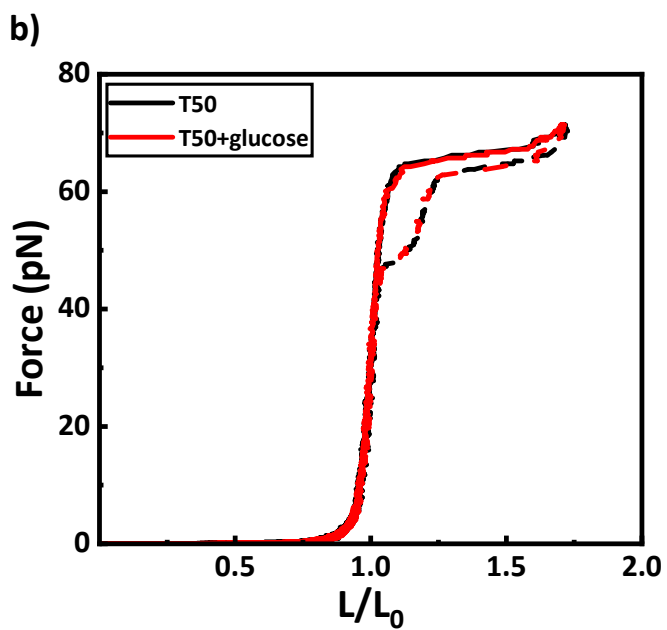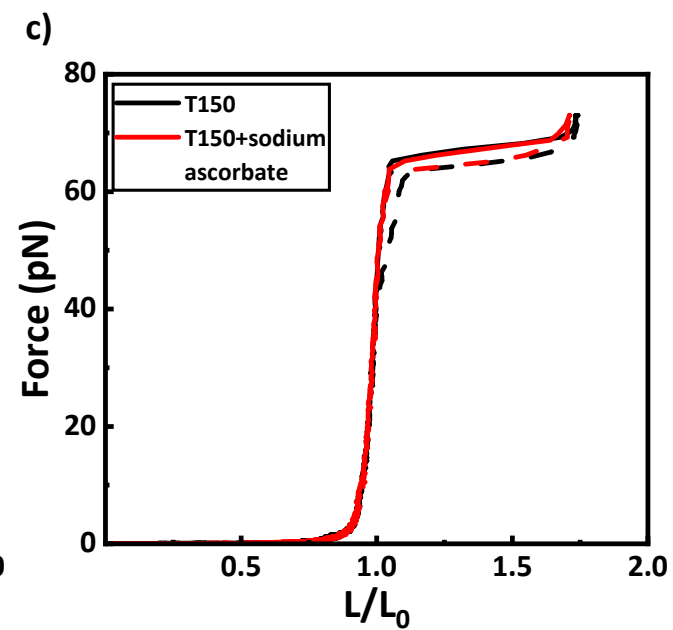

Supplement: d4nr04287e11.pdf [file d4nr04287e11.pdf]

a)

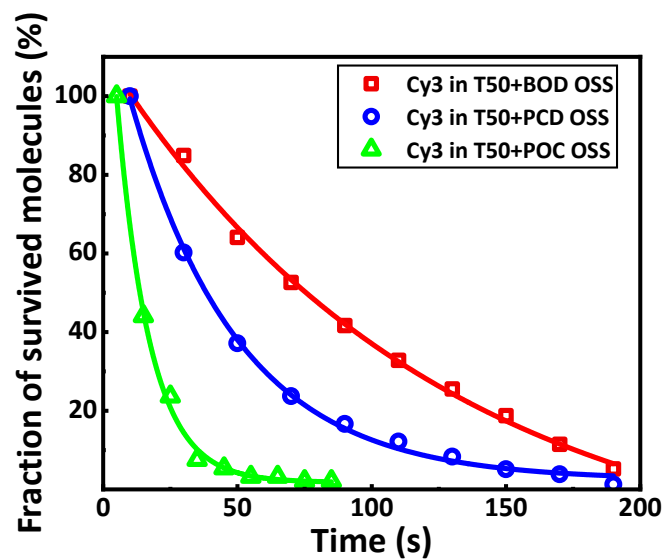

b)

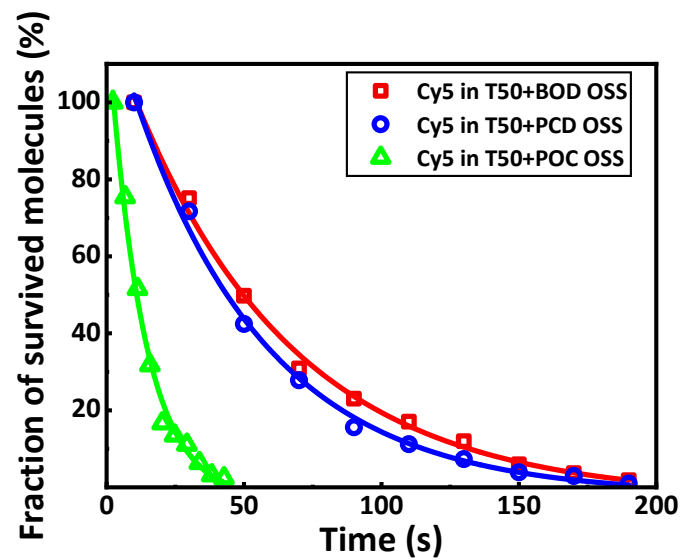

c)

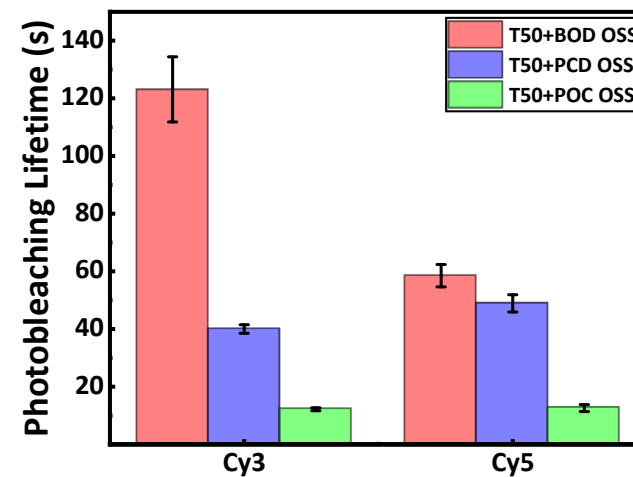

Supplement: d4nr04287e12.pdf [file d4nr04287e12.pdf]

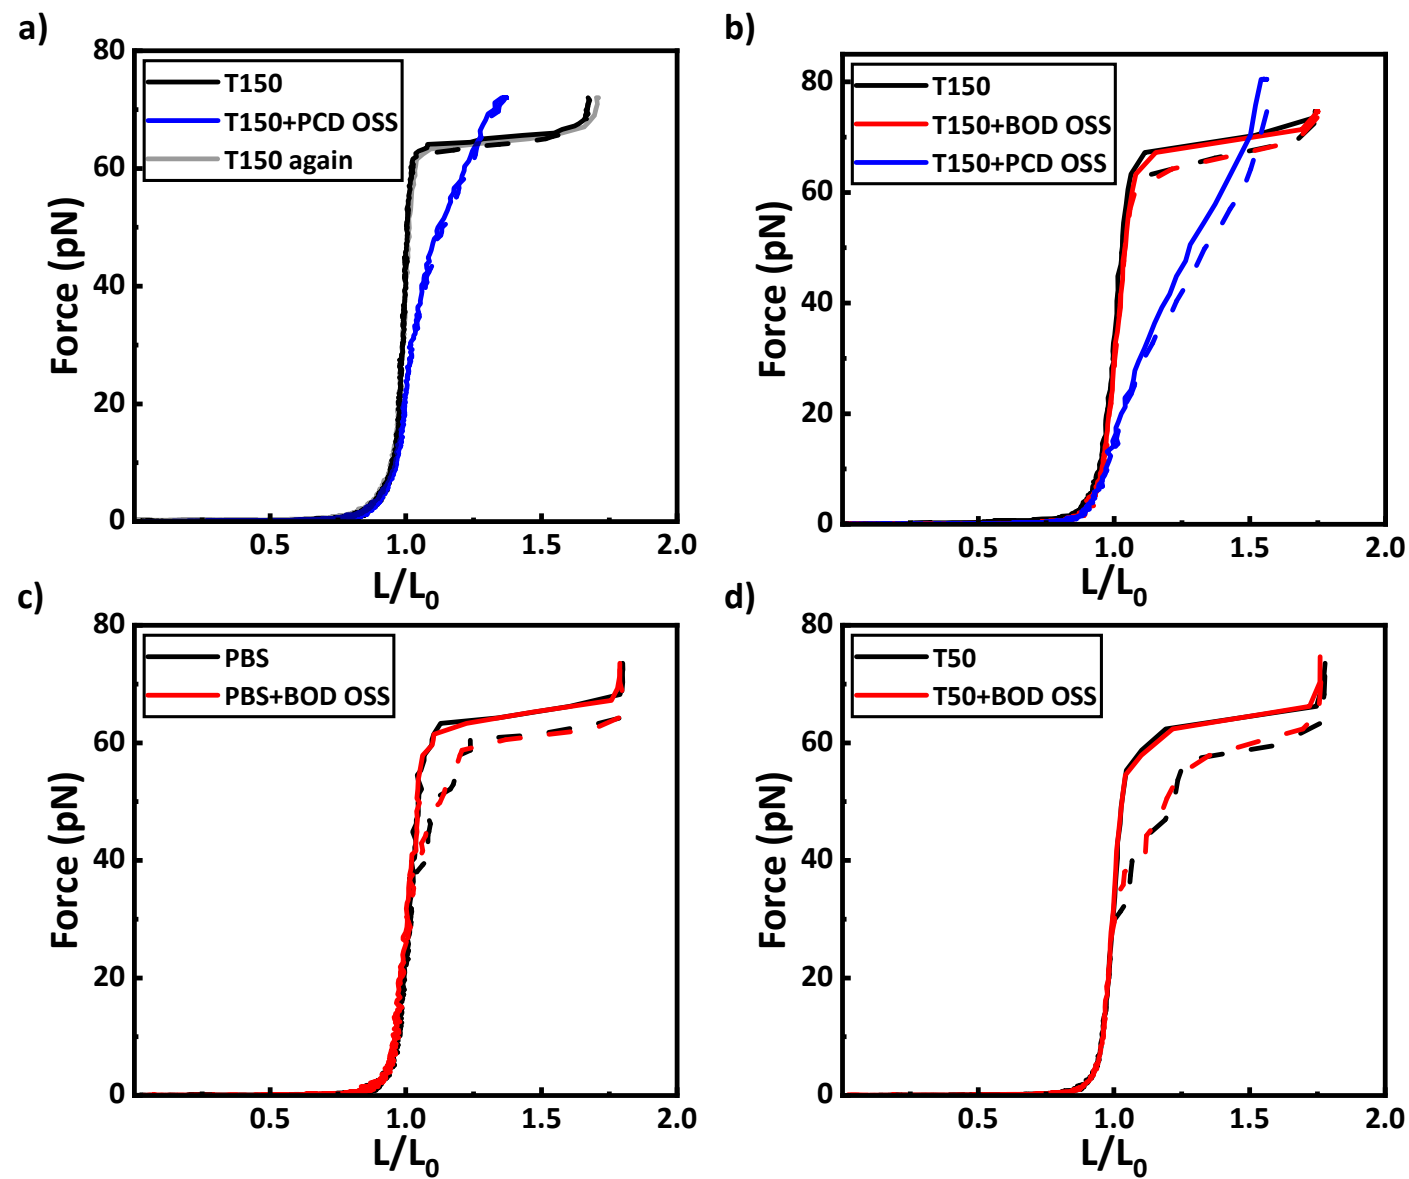

Supplement: d4nr04287e2.pdf [file d4nr04287e2.pdf]

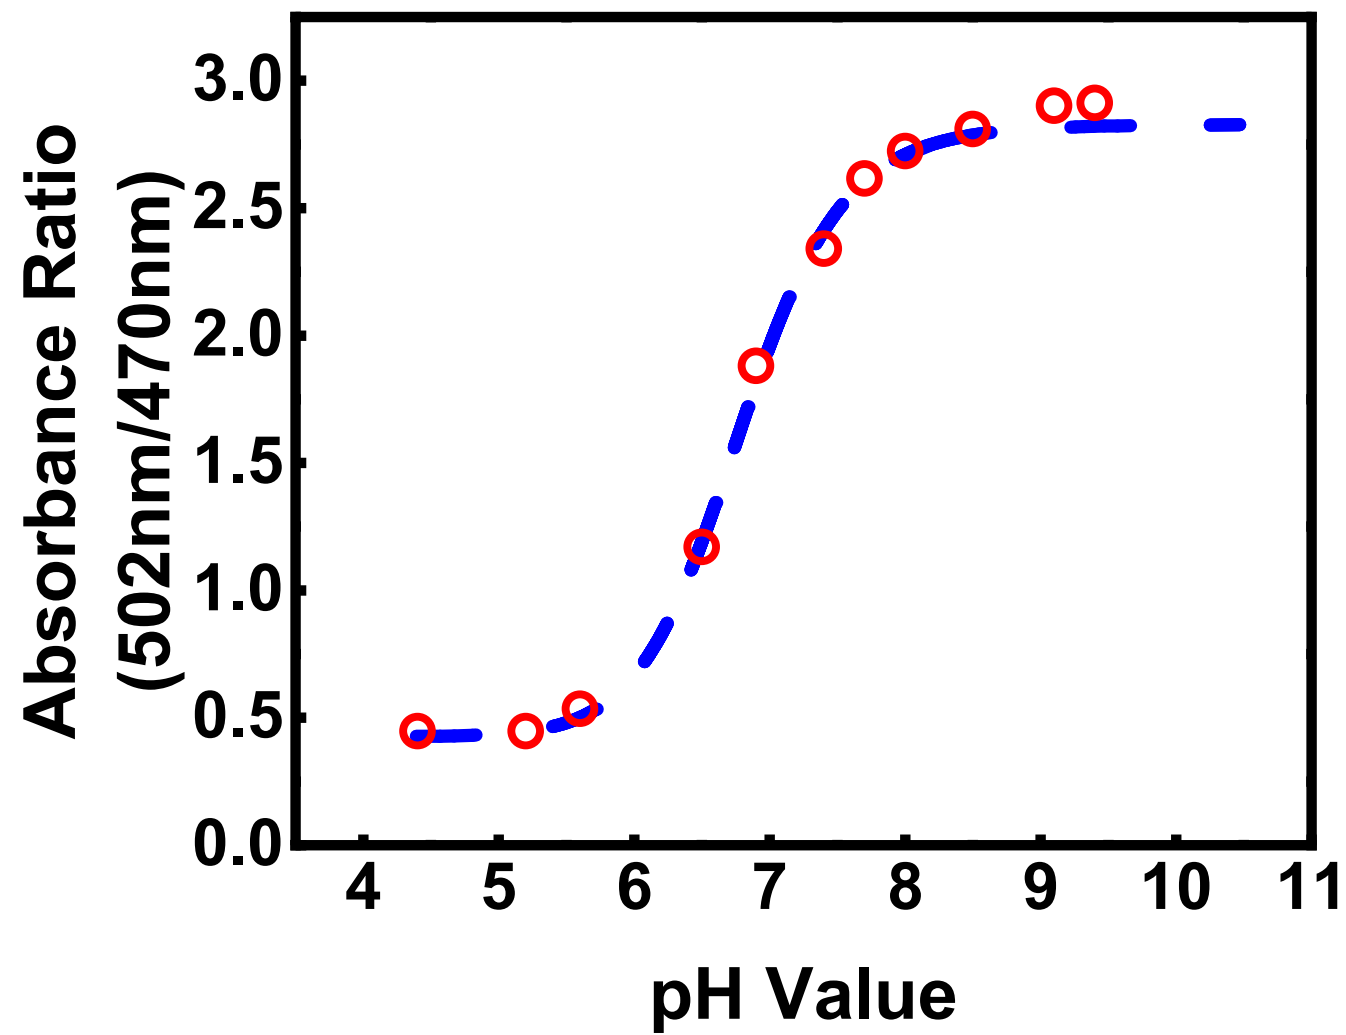

Supplement: d4nr04287e3.pdf [file d4nr04287e3.pdf]

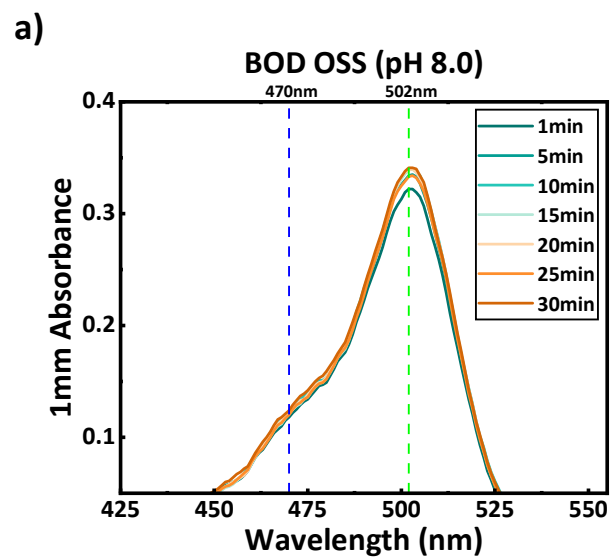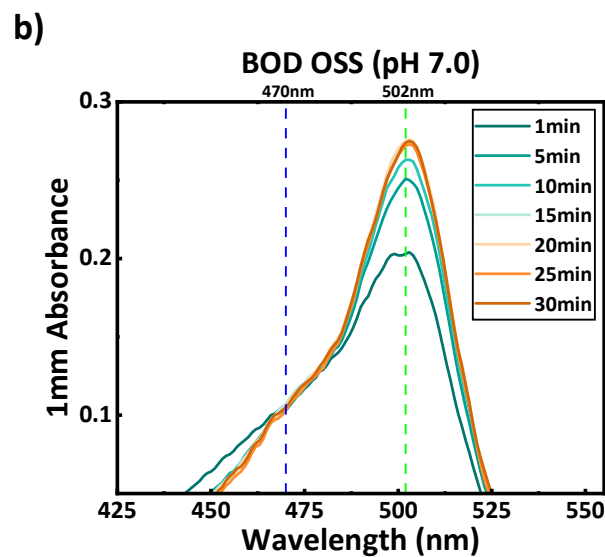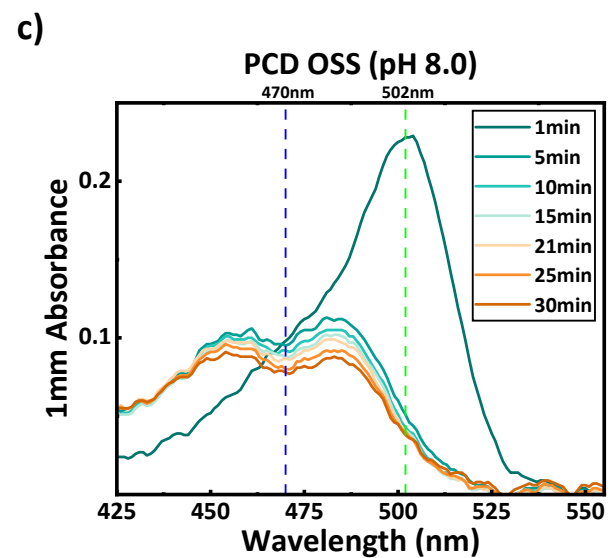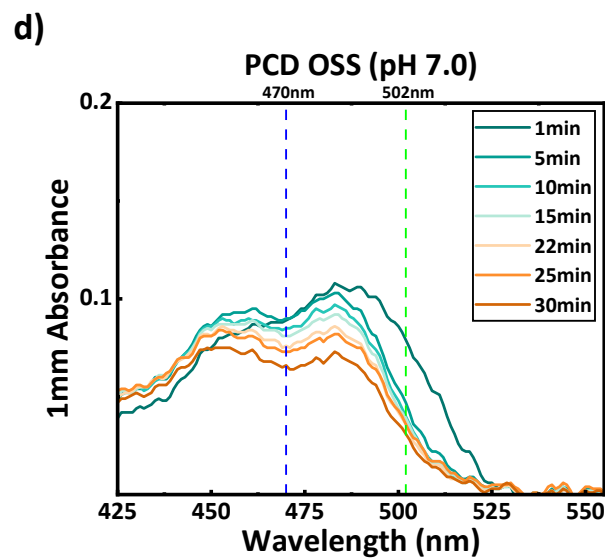

Supplement: d4nr04287e4.pdf [file d4nr04287e4.pdf]

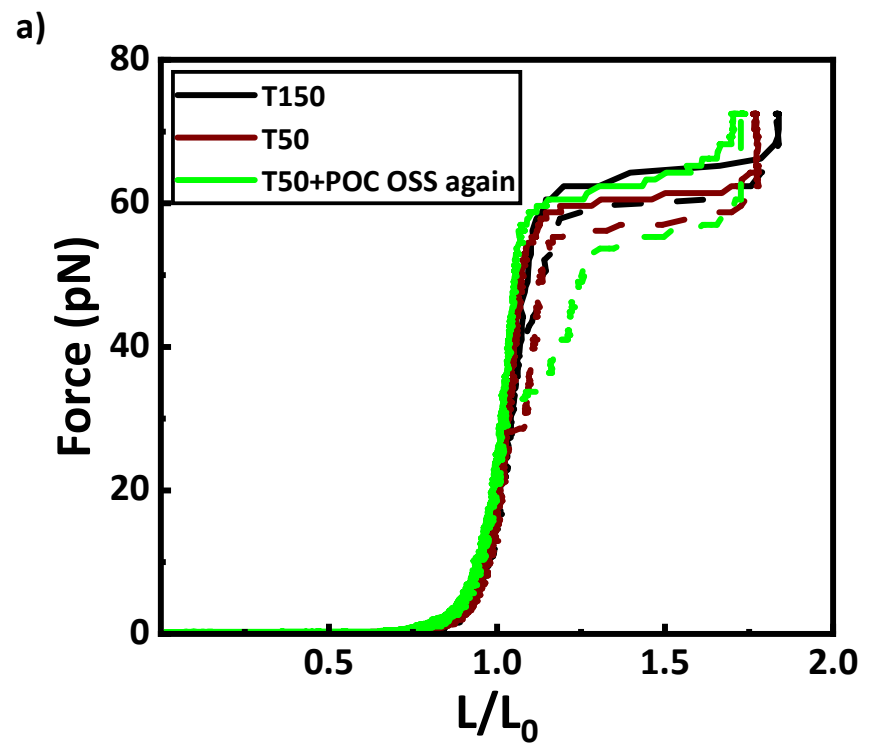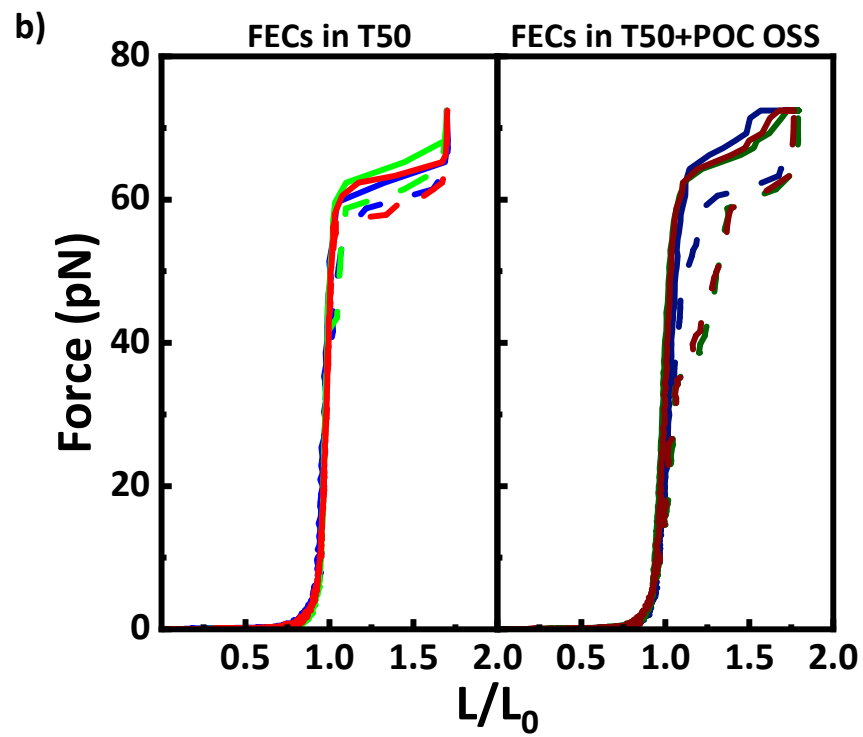

Supplement: d4nr04287e5.pdf [file d4nr04287e5.pdf]

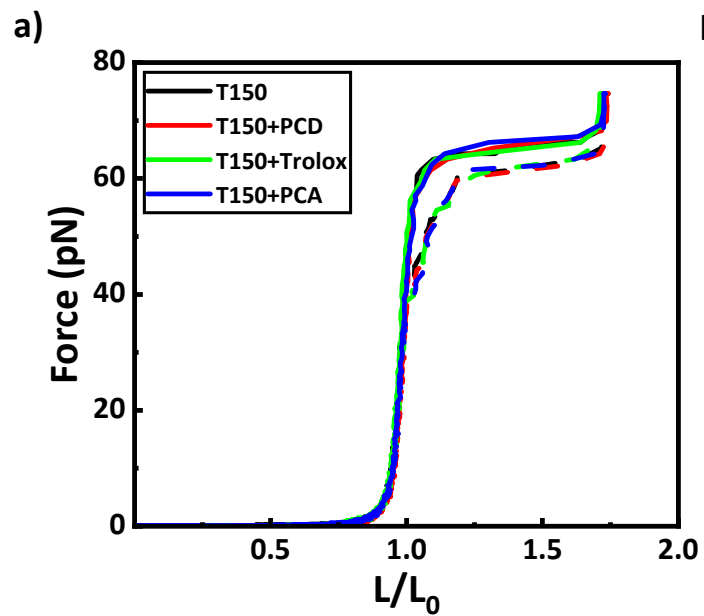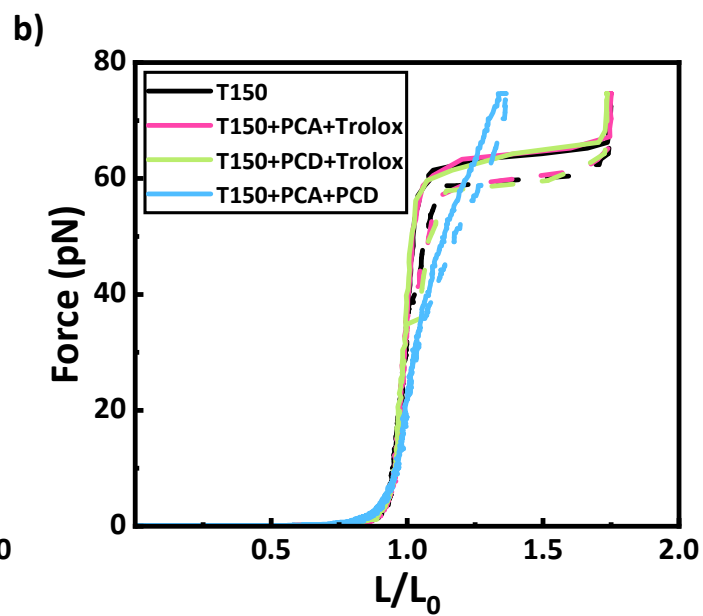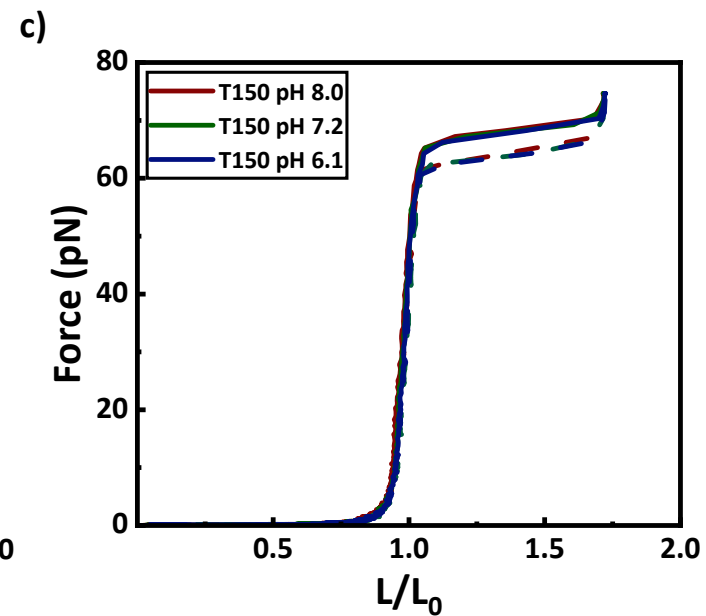

Supplement: d4nr04287e6.pdf [file d4nr04287e6.pdf]

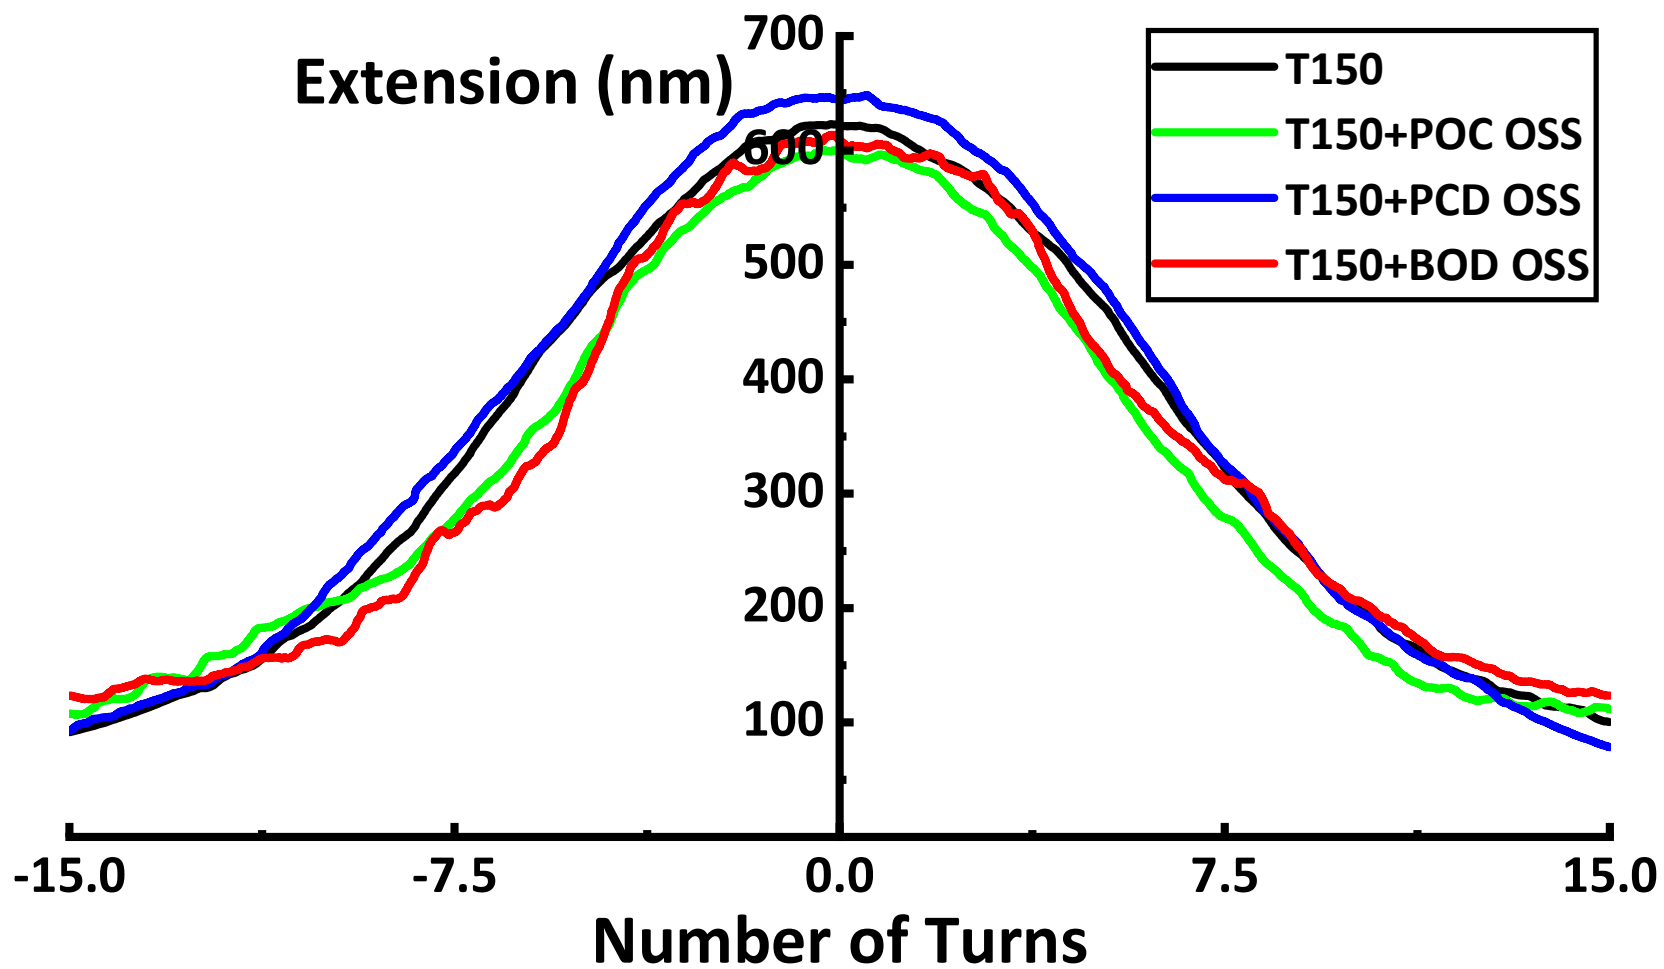

Supplement: d4nr04287e7.pdf [file d4nr04287e7.pdf]

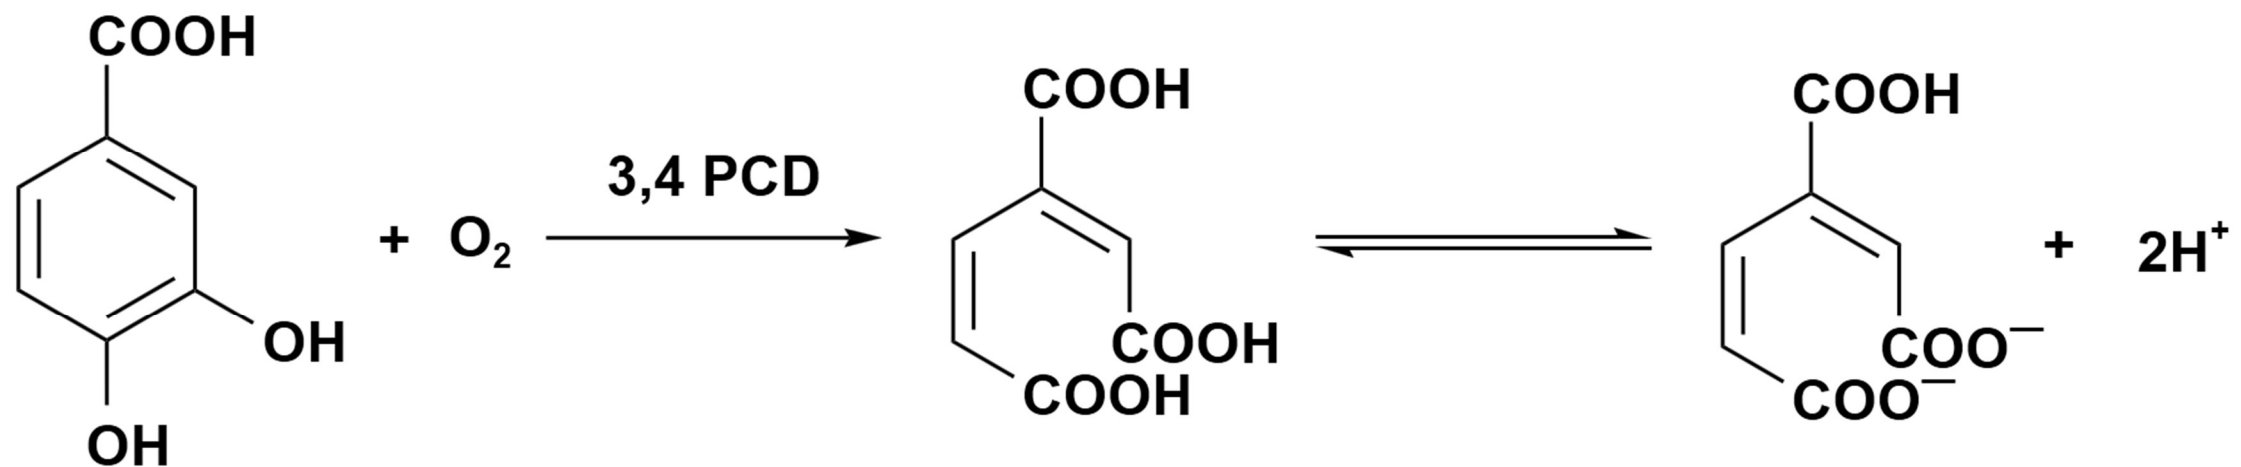

Supplement: d4nr04287e8.pdf [file d4nr04287e8.pdf]

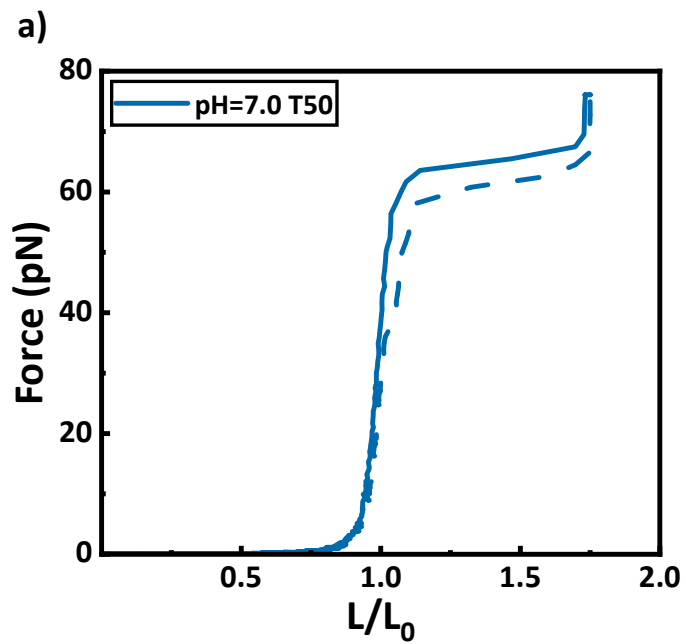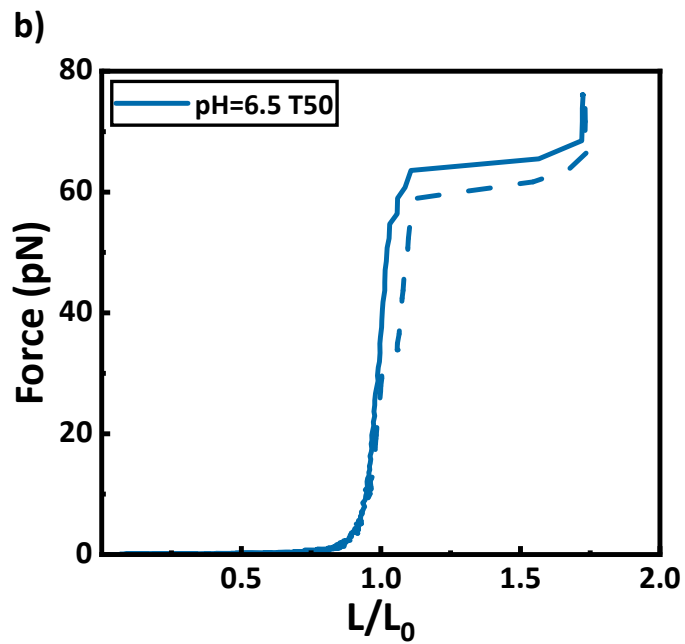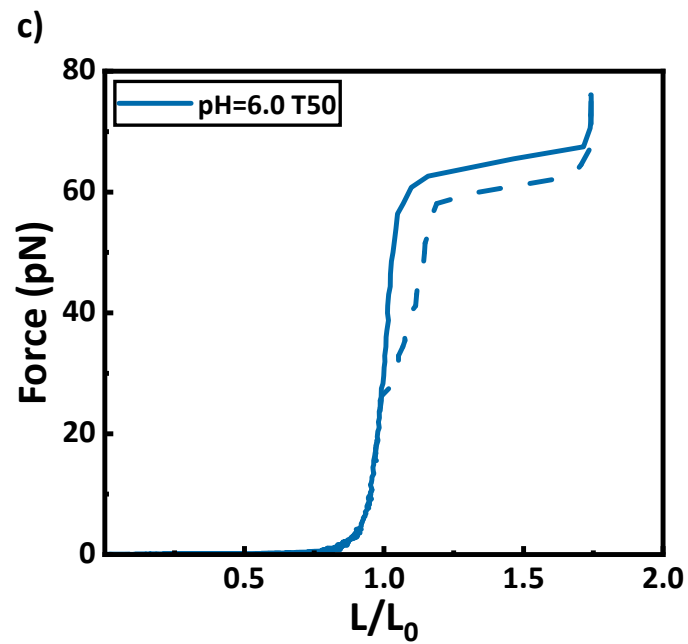

Supplement: d4nr04287e9.pdf [file d4nr04287e9.pdf]
